# Supplementary material for: Hybrid immunity versus vaccine-induced immunity against SARS CoV2 in Patients with Autoimmune Rheumatic Diseases
Source: bioRxiv or medRxiv preprint supplement (doi:10.1101/2021.08.26.21258418), 2021-08-31

Supplementary Figure 1

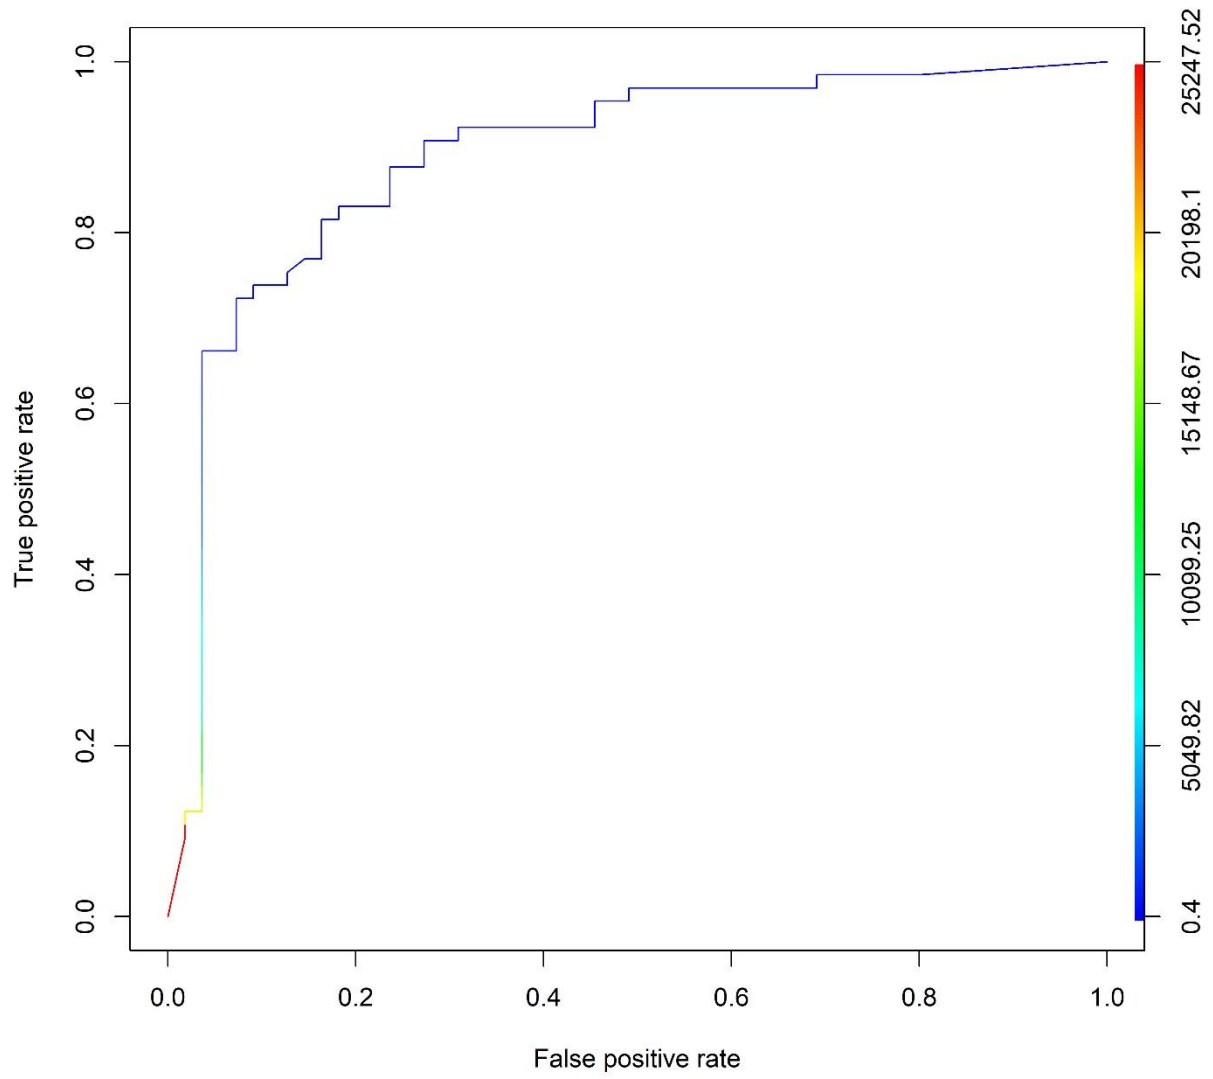

Supplement: Supplementary file [file media-1.pdf]
